# Supplementary material
Source: PubMed Central journal article supplement (PMC7035589)
Supplement: DC191465SupplementaryData.pdf [file DC191465SupplementaryData.pdf]

SUPPLEMENTARY DATA

**Supplementary Table 1. Participants' Characteristics at Baseline**

| <b>Characteristics</b>                                | <b>Value (Mean ± SEM)</b> |
|-------------------------------------------------------|---------------------------|
| Age (years)                                           | 26.6 ± 2.2                |
| Sex (Male/female)                                     | 4/11                      |
| Waist circumference (cm)                              | 102.2 ± 3.2               |
| BMI (kg/m <sup>2</sup> )                              | 33.7 ± 1.2                |
| Body Fat (%)                                          | 39.6 ± 1.7                |
| Fasting blood glucose (mg/dL)                         | 91.5 ± 1.2                |
| Systolic blood pressure (mmHg)                        | 117.6 ± 3.3               |
| Diastolic blood pressure (mmHg)                       | 69.7 ± 3.0                |
| Total cholesterol, mg/dL                              | 167.7 ± 8.0               |
| LDL cholesterol(mg/dL)                                | 105.9 ± 6.7               |
| HDL cholesterol(mg/dL)                                | 45.1 ± 3.3                |
| Triglycerides(mg/dL)                                  | 100.3 ± 17.0              |
| VO <sub>2</sub> max (mL/kg of body weight per minute) | 32.7 ± 1.8                |

Abbreviations: LDL, low-density lipoprotein; HDL, high-density lipoprotein; VO<sub>2</sub> max, maximal oxygen consumption; SEM, standard error of the mean.

SUPPLEMENTARY DATA

**Supplementary Table 2.** Changes in Blood Pressure and Heart Rate during each study

| Parameter Measured Over Time (min) | Insulin clamp protocol | GLP-1 protocol | GLP-1 + insulin clamp protocol |
|------------------------------------|------------------------|----------------|--------------------------------|
| Systolic blood pressure, mm Hg     |                        |                |                                |
| 0                                  | 113±3                  | 115±4          | 114±3                          |
| 30                                 | 112±3                  | 117±3          | 116±4                          |
| 60                                 | 113±4                  | 115±4          | 117±4                          |
| 90                                 | 114±4                  | 112±4          | 116±4                          |
| 150                                | 113±3                  | 114±3          | 116±4                          |
| Diastolic blood pressure, mm Hg    |                        |                |                                |
| 0                                  | 66±2                   | 67±3           | 69±3                           |
| 30                                 | 65±2                   | 67±3           | 71±3                           |
| 60                                 | 65±3                   | 66±3           | 67±3                           |
| 90                                 | 65±3                   | 68±3           | 65±3                           |
| 150                                | 66±3                   | 64±3           | 66±3                           |
| Heart rate, bpm                    |                        |                |                                |
| 0                                  | 58±2                   | 59±2           | 61±2                           |
| 30                                 | 59±2                   | 60±2           | 60±2                           |
| 60                                 | 61±2                   | 62±2           | 66±2                           |
| 90                                 | 65±2                   | 64±2           | 65±2                           |
| 150                                | 64±2                   | 63±2           | 66±2                           |
